# Supplementary material for: Discovery and functional interrogation of SARS-CoV-2 protein-RNA interactions
Source: Research Square preprint supplement (doi:10.21203/rs.3.rs-1394331/v1), 2022-03-17

Supplementary Figure 6

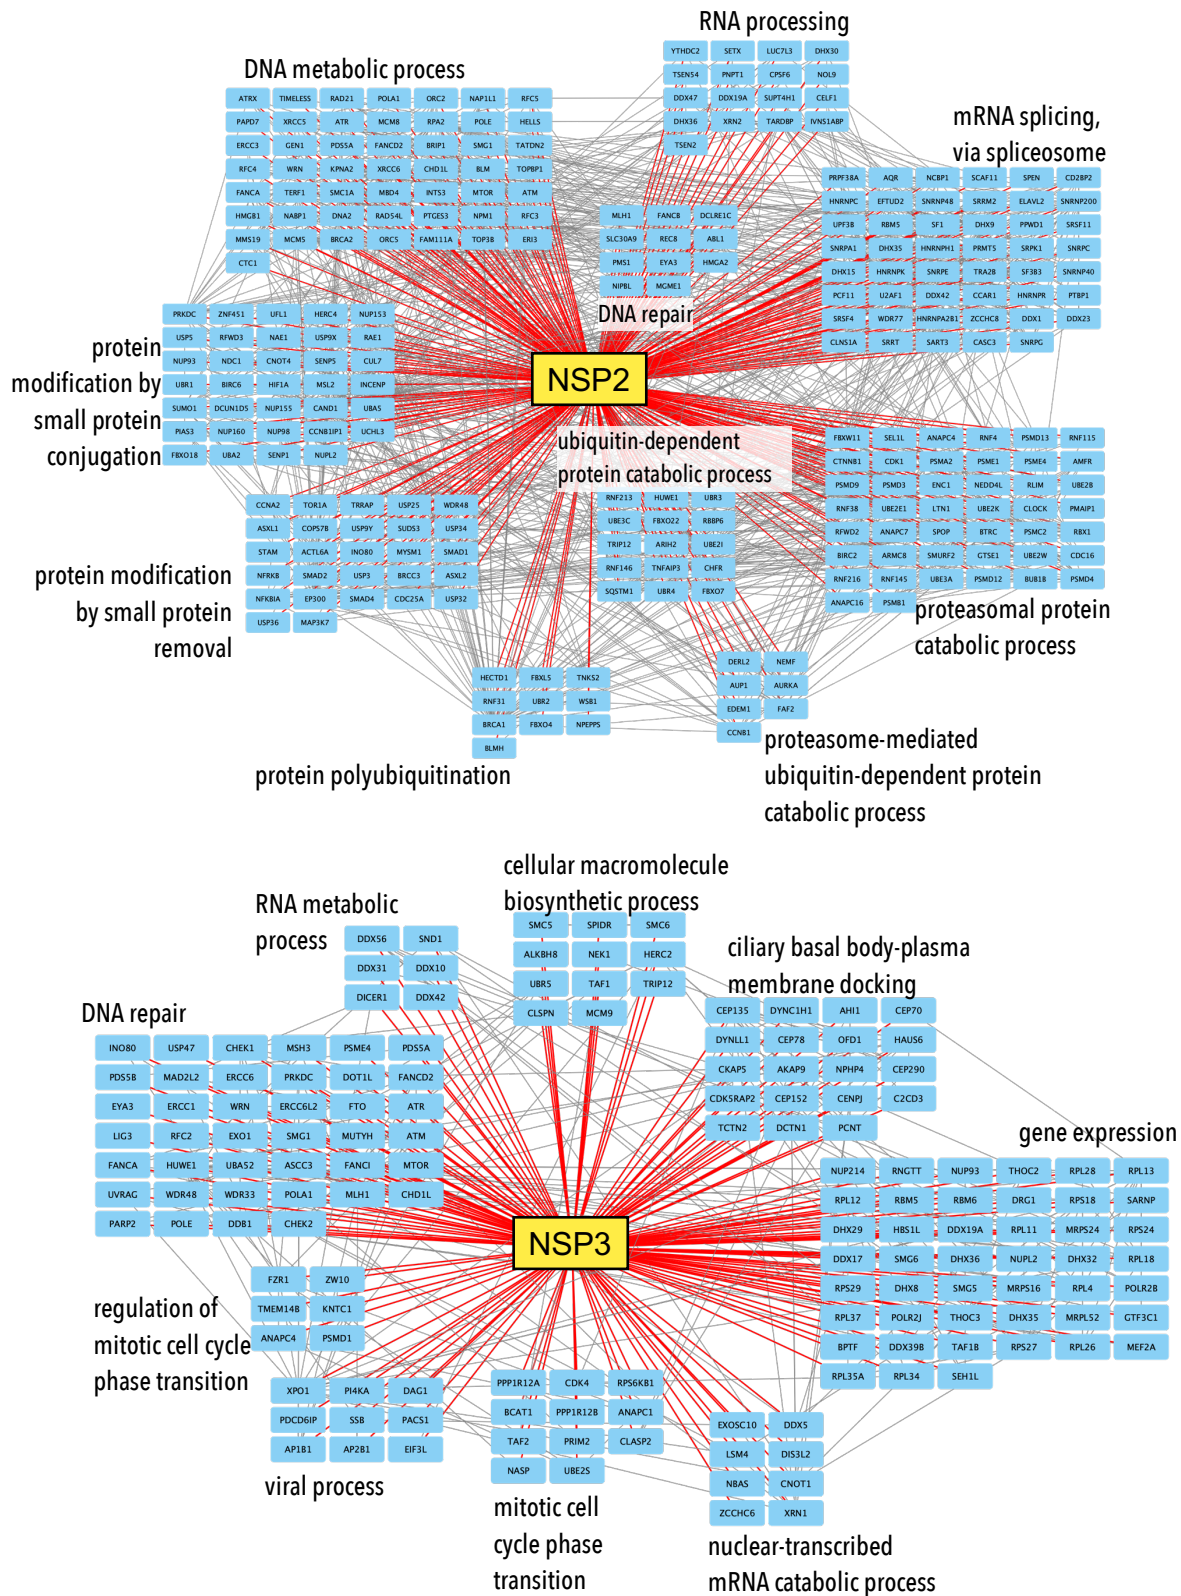

Supplementary Figure 6

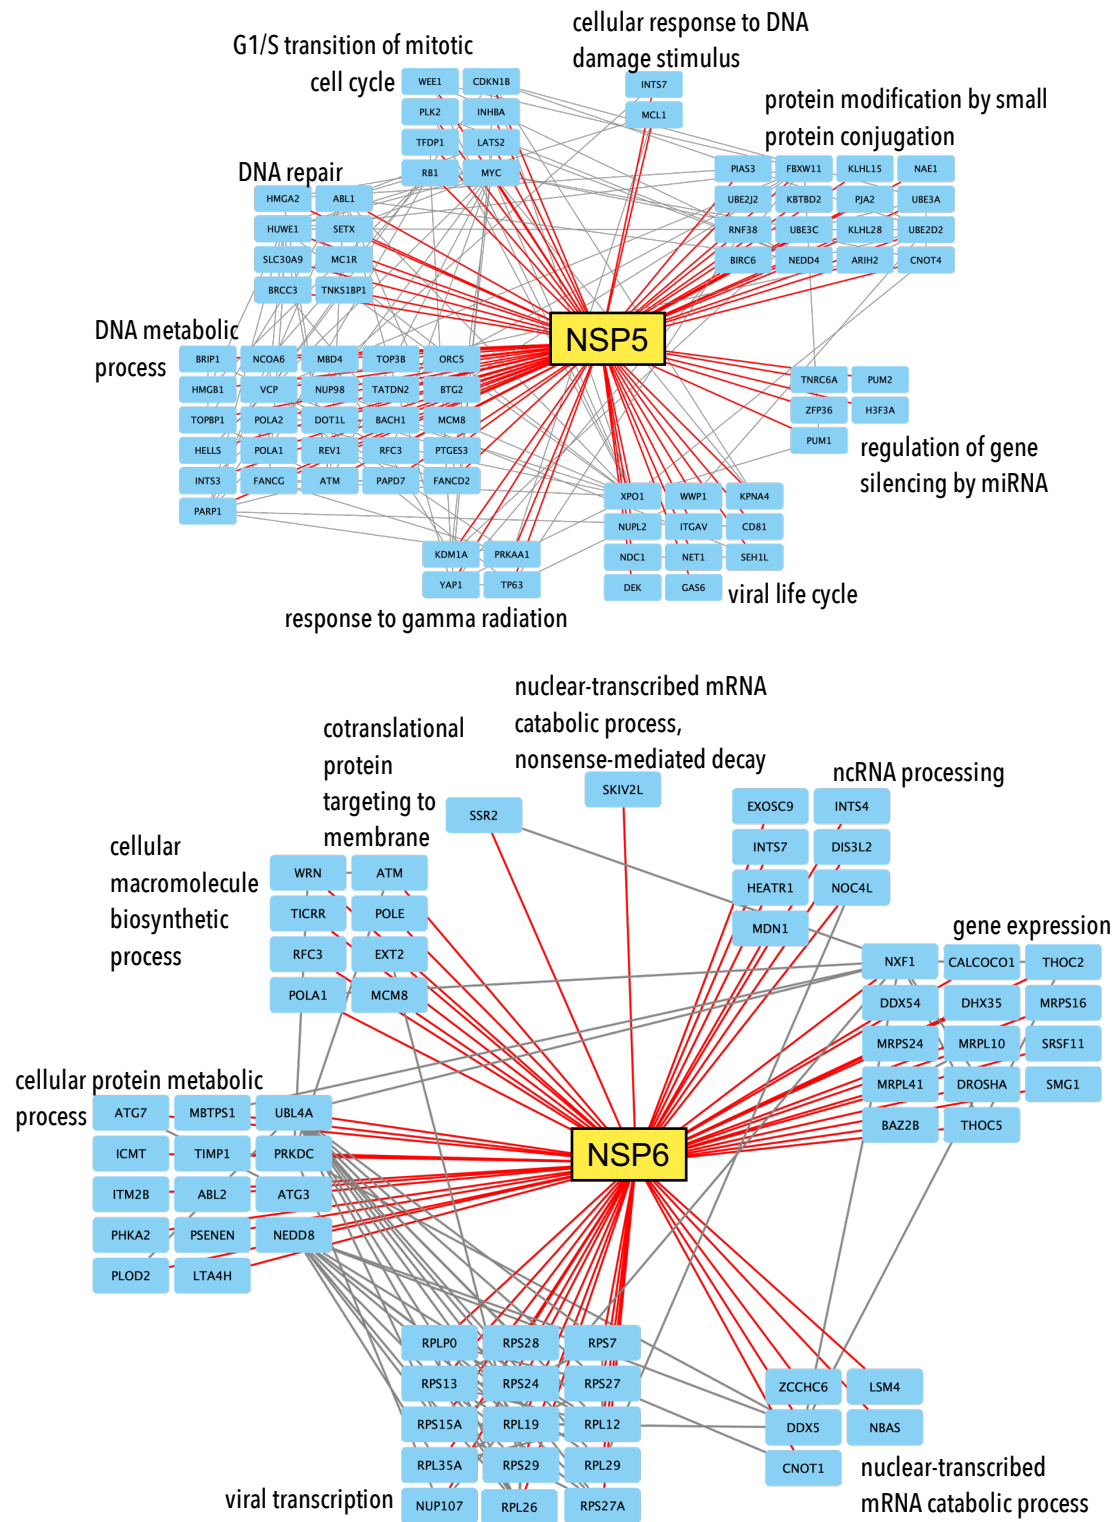

Supplementary Figure 6

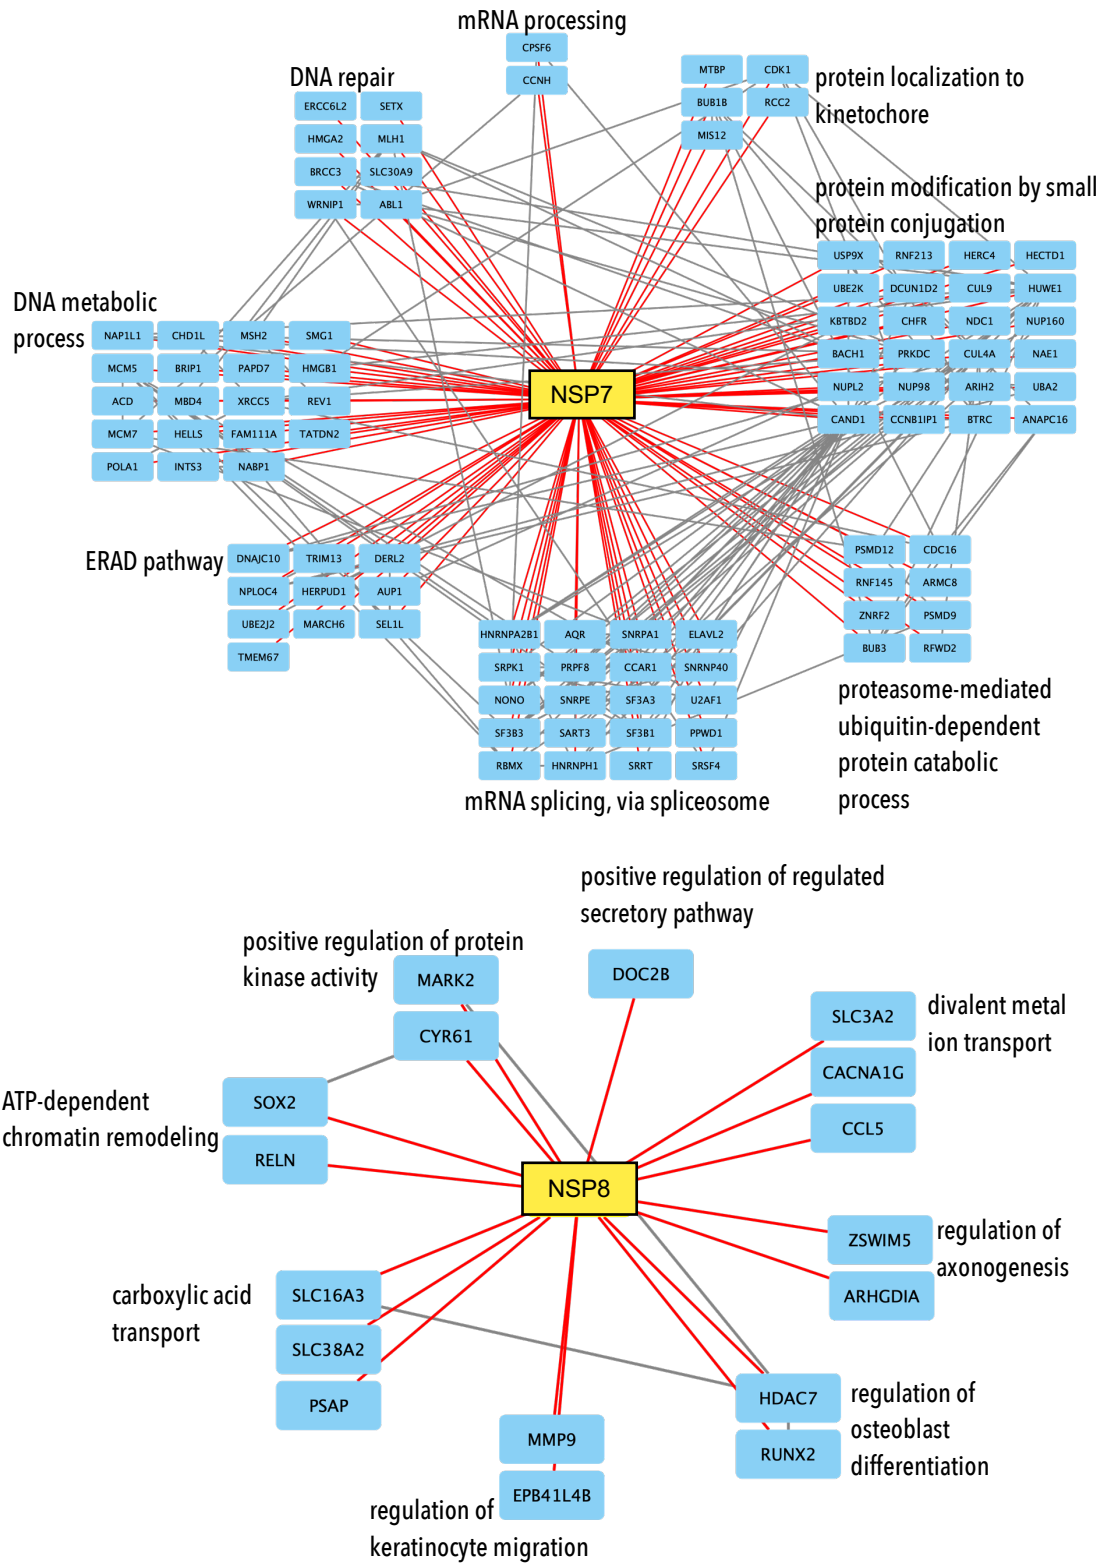

Supplementary Figure 6

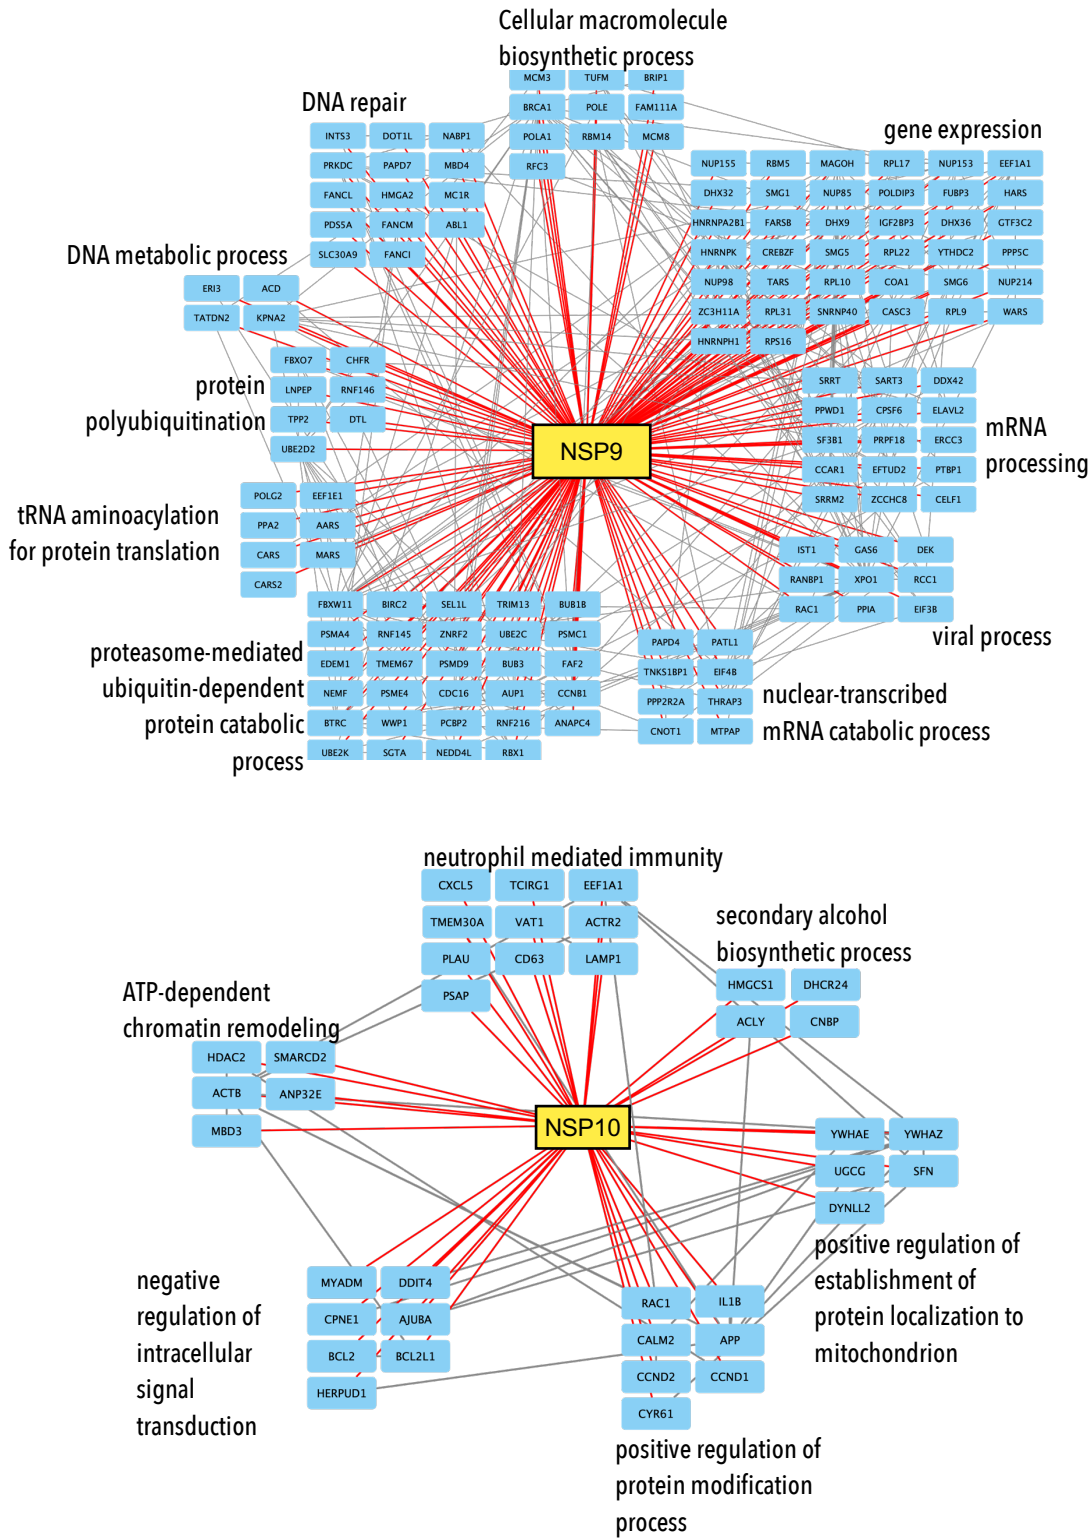



Supplementary Figure 6

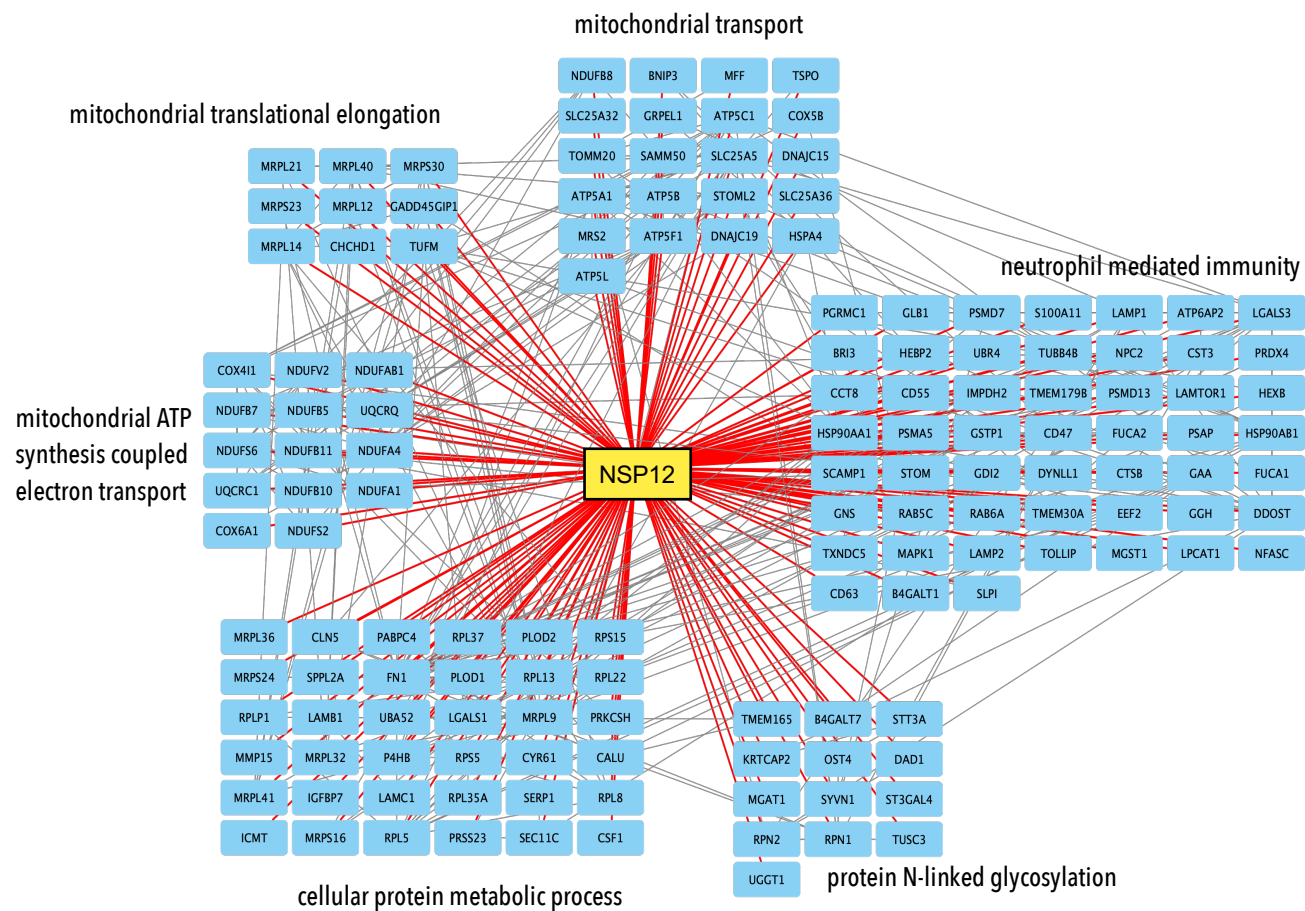

Supplementary Figure 6

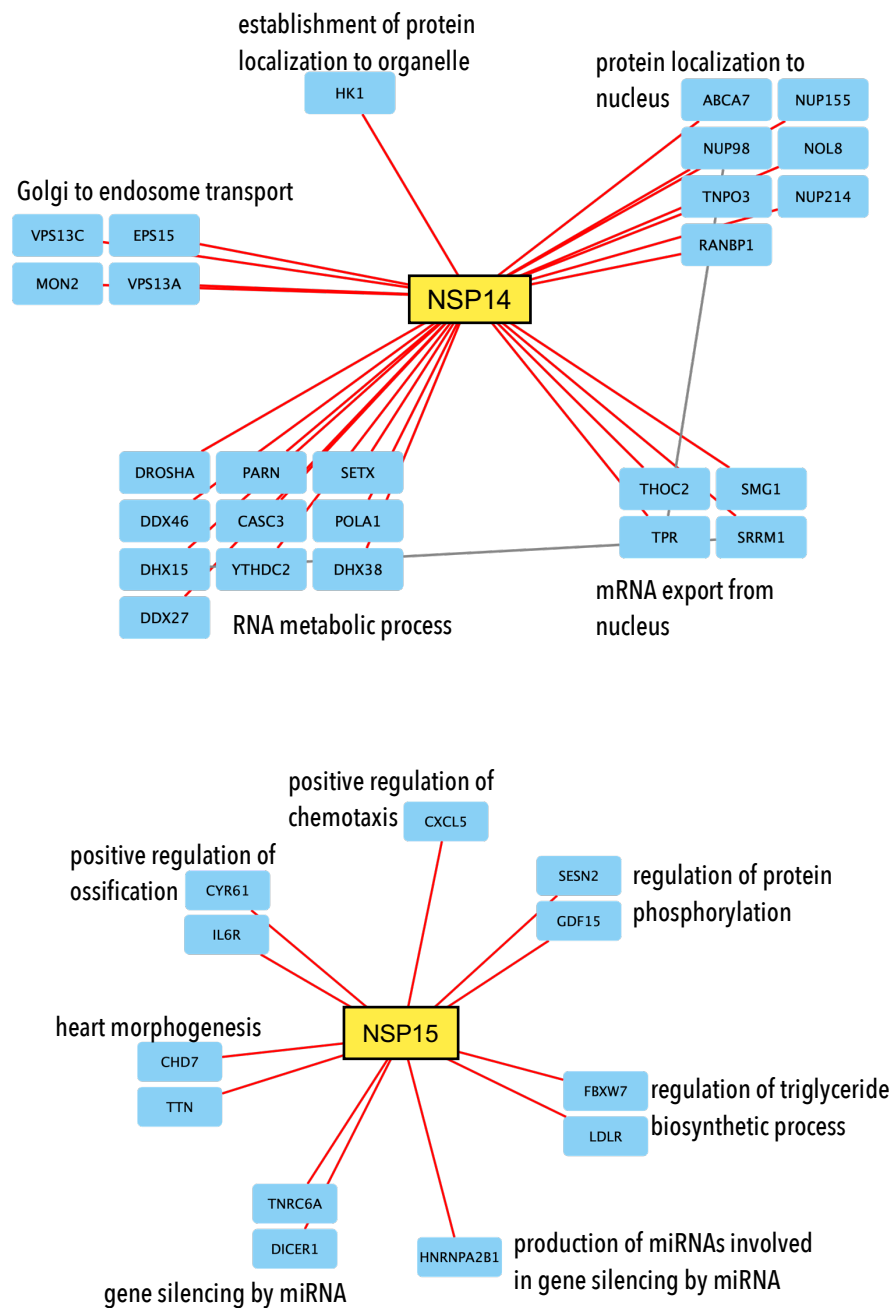

Supplementary Figure 6

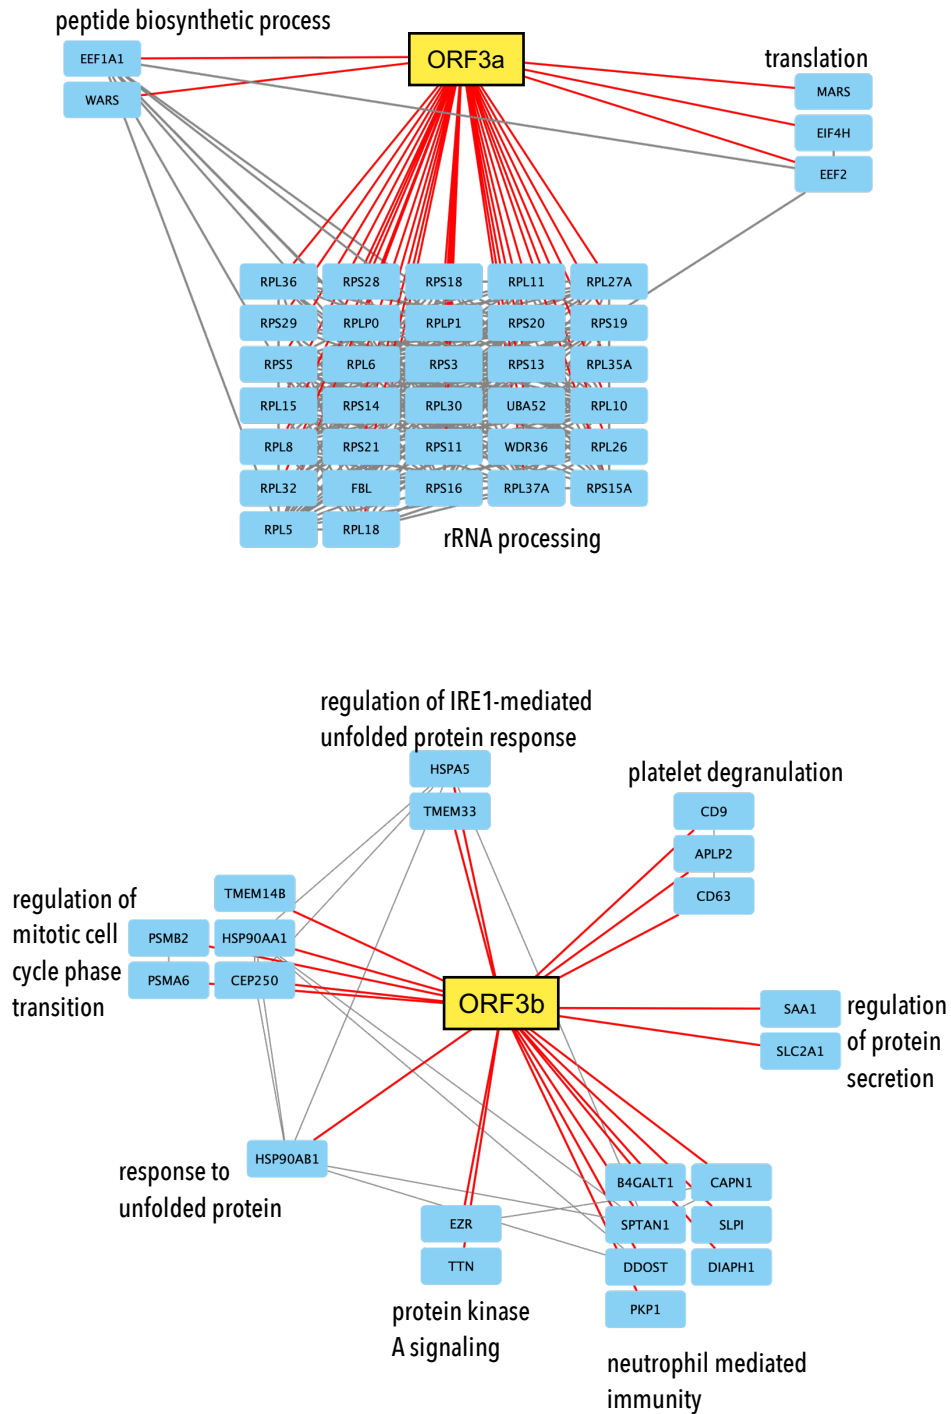

Supplementary Figure 6

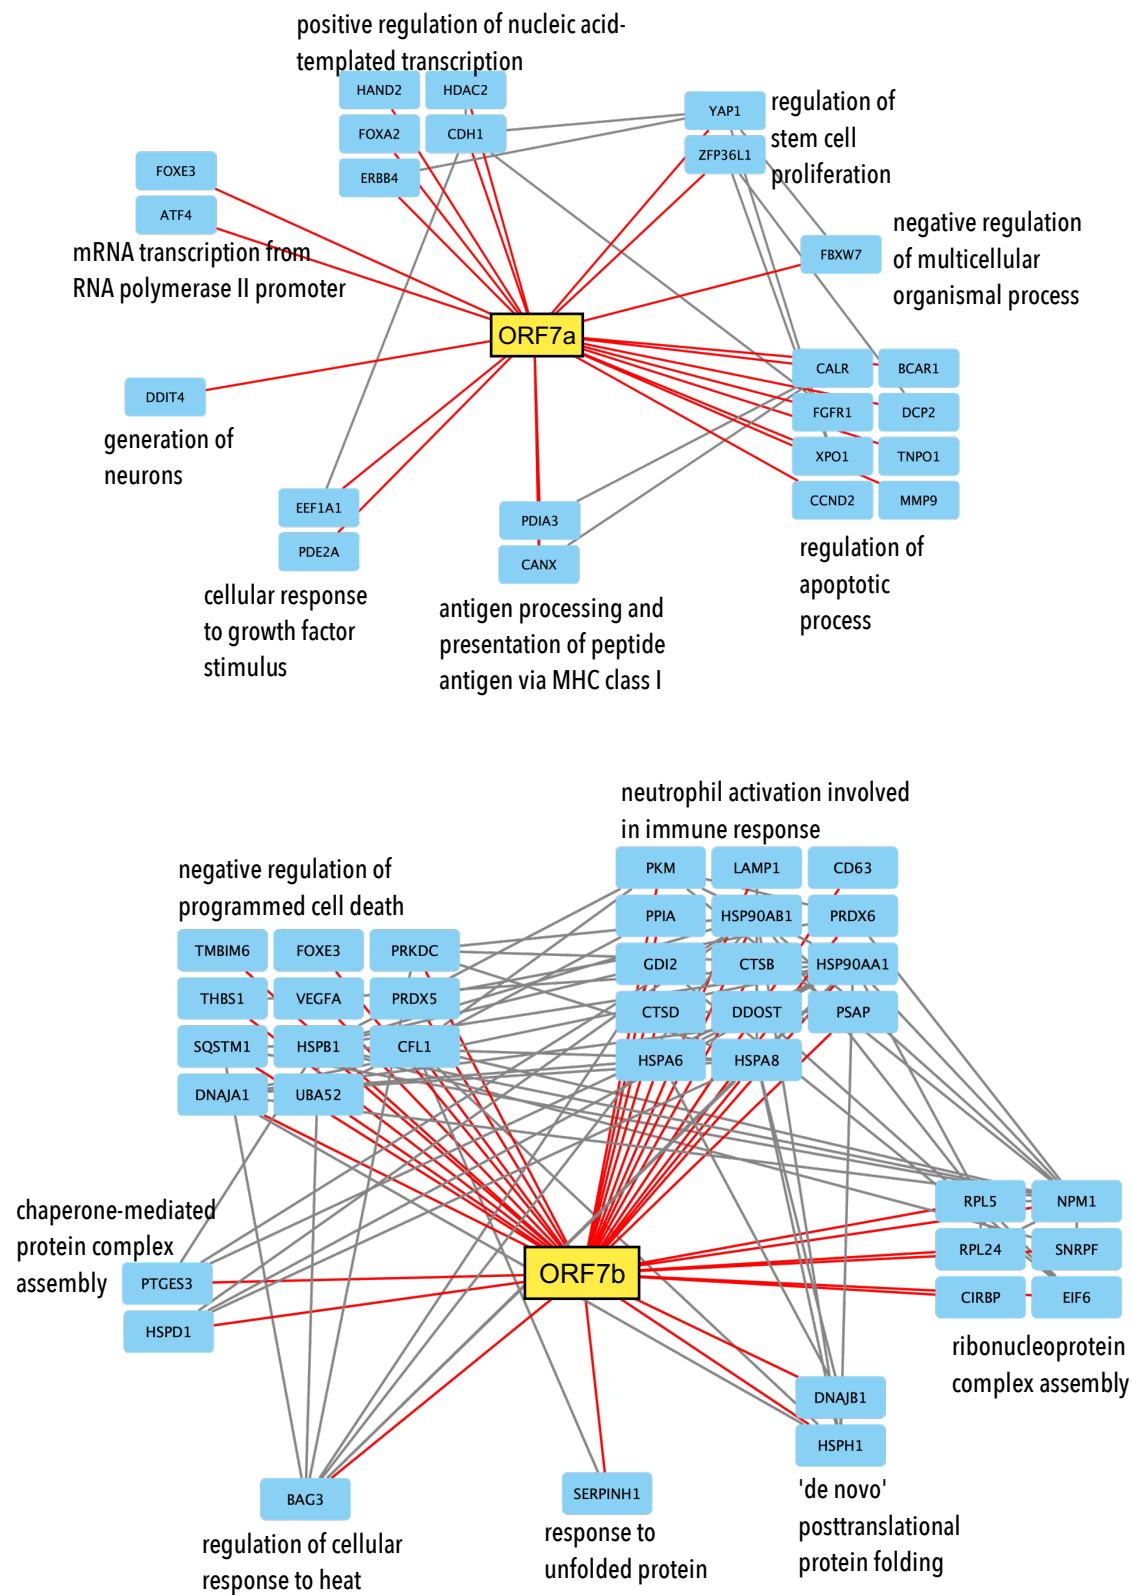



Supplementary Figure 6

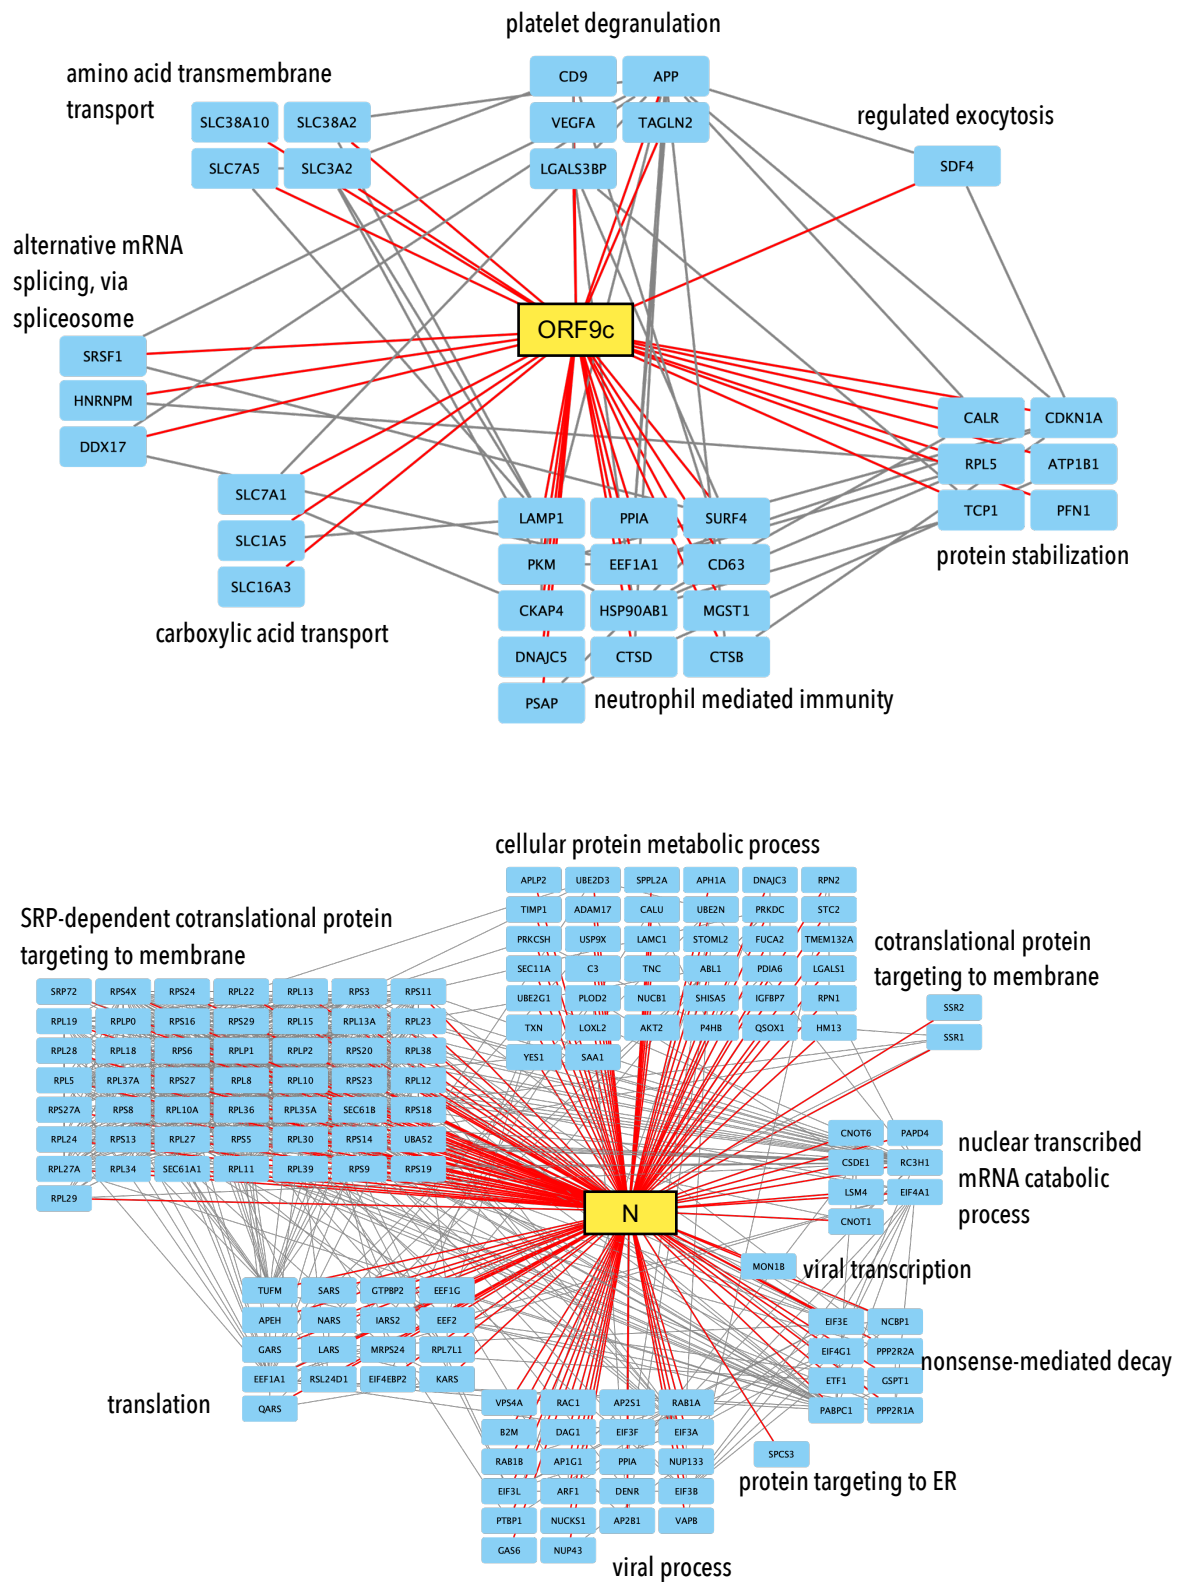

Supplement: Supplementary file [file ef1ffcd95cab4a5b42e44785.pdf]
